# Supplementary material
Source: publisher figshare collection journal article supplement (https://gsapubs.figshare.com/ndownloader/files/22666256)
Supplement: Supplementary file 1 [file 22666256]

## Sheet: PlotDat7
Source sheet	Pinonal 1	0.3	294.095	1	302.395	13.8304	17	350.97	12.954
Plot name	Average7	36.7	294.095	2	296.424	13.5919	IsoLine	IsoLine	IsoLine	IsoLine
Plot Type	15			3	304.412	13.8433
1st free col	11			4	306.495	7.29608
Sigma Level	1			5	278.269	10.6237
Absolute Errs	TRUE			6	286.159	8.88815
Symbol Type	1			7	295.722	7.3277
Inverse Plot	FALSE			8	312.981	13.1291
Color Plot	TRUE			9	313.146	11.5571
3D plot	FALSE			10	296.196	11.6116
Linear	FALSE			11	280.771	6.34067
Data Range	X2:Y44			12	275.18	11.8554
Filled Symbols	FALSE			13	294.082	11.2726
ConcAge	FALSE			14	283.963	11.8422
ConcSwap	FALSE			15	297.916	8.29567
1st Symbol-row	1			16	298.336	8.3602
				18	291.471	5.19714
				19	291.721	9.93839
				20	307.523	10.7468
				21	293.911	12.4139
				22	294.379	10.244
				23	310.644	10.2351
				24	287.428	10.364
				25	291.669	9.1951
				26	305.815	8.9424
				27	295.132	10.182
				28	298.253	8.5073
				29	277.411	6.29823
				30	307.456	12.9792
				31	292.932	7.46285
				32	304.614	11.2158
				33	290.235	9.98346
				34	305.499	12.7726
				35	282.235	10.4195
				36	302.98	9.38584
				IsoLine	IsoLine	IsoLine	IsoLine

## Sheet: Pinonal 1
This supplemental material accompanies Coombs, H.E., Kerr, A.C., Pindell, J., Buchs, D., Weber, B., and Solari, L., 2020, Petrogenesis of the crystalline basement along the western Gulf of Mexico: Postcollisional magmatism during the formation of Pangea,
in Martens, U., and Molina Garza, R.S., eds., Southern and Central Mexico: Basement Framework, Tectonic Evolution, and Provenance of Mesozoic–Cenozoic Basins: Geological Society of America Special Paper 546, https://doi.org/10.1130/2020.2546(02).
Analysis	AnalysisName	AnalysisType	U (ppm)	Th/U	Ratio 207Pb/235U	Error1S	Ratio 206Pb/238U	Error1S	rho	% Error 6/8 1S	% disc. (6/8-7/5)	Filter	Ratio 238U/206Pb	Error1S	Ratio 207Pb/206Pb	Error1S	206Pb/238U Age (Ma)	Error1S	207Pb/235Pb Age (Ma)	Error1S	207Pb/206Pb Age (Ma)	Error1S	"Best Age"	Unc 1S
166	Zircon_132	unknown	65.1533	0.360135	0.451027	0.0438426	0.0474107	0.00209726	0.455075	4.42361	26.5841	High disc	21.0923	0.93304	0.0689963	0.00597215	298.614	12.9083	377.998	30.6797	898.628	312.623	298.614	12.9083
173	Zircon_138	unknown	156.897	0.413874	0.439436	0.0362719	0.0466055	0.00175771	0.456914	3.77146	25.9479	High disc	21.4567	0.80923	0.0683844	0.00502092	293.657	10.8267	369.855	25.5863	880.228	262.829	293.657	10.8267
200	Zircon_160	unknown	65.3076	0.328686	0.251167	0.0340215	0.0451314	0.0020629	0.33745	4.57088	20.0466	High disc	22.1575	1.0128	0.040363	0.00514662	284.571	12.7245	227.524	27.6101	1	269.414	284.571	12.7245
167	Zircon_133	unknown	96.7959	0.370789	0.28924	0.0268091	0.0477367	0.0012614	0.285086	2.64241	-14.1906	Inv disc	20.9482	0.553539	0.0439445	0.00390411	300.621	7.76128	257.961	21.1144	1	204.371	300.621	7.76128
178	Zircon_142	unknown	65.7479	0.557748	0.290116	0.0353992	0.0439146	0.00193724	0.361537	4.41138	-6.64476	Inv disc	22.7715	1.00454	0.0479139	0.00545088	277.061	11.9633	258.651	27.8609	95.0214	285.34	277.061	11.9633
183	Zircon_146	unknown	147.935	0.359377	0.294679	0.0197212	0.046982	0.00136693	0.43474	2.90947	-11.3996	Inv disc	21.2848	0.619274	0.0454901	0.00274165	295.975	8.41663	262.235	15.4668	1	143.519	295.975	8.41663
189	Zircon_151	unknown	75.0035	0.359337	0.295275	0.0389338	0.0463203	0.00167777	0.274701	3.62209	-10.0024	Inv disc	21.5888	0.781966	0.0462332	0.0058616	291.9	10.3371	262.703	30.5207	9.79832	306.84	291.9	10.3371
158	Zircon_125	unknown	67.0938	0.346629	0.327893	0.0372362	0.048025	0.0022484	0.412262	4.68173	-4.77471		20.8225	0.974852	0.0495181	0.00512326	302.395	13.8304	287.956	28.4729	172.434	268.19	302.395	13.8304
195	Zircon_156	unknown	69.5006	0.534164	0.380657	0.039956	0.0470548	0.00220759	0.446958	4.69153	10.4909		21.2518	0.997034	0.0586717	0.00550914	296.424	13.5919	327.522	29.385	554.935	288.388	296.424	13.5919
196	Zircon_157	unknown	88.0939	0.349453	0.411426	0.030693	0.0483531	0.0022512	0.624083	4.65575	14.9433		20.6812	0.962865	0.0617115	0.00359719	304.412	13.8433	349.902	22.0806	664.126	188.302	304.412	13.8433
156	Zircon_124_Pinonal1	unknown	180.353	0.984919	0.369693	0.0196684	0.0486918	0.00118688	0.458163	2.43753	4.21895		20.5373	0.500603	0.055066	0.00260406	306.495	7.29608	319.426	14.5806	414.905	136.315	306.495	7.29608
159	Zircon_126	unknown	53.8024	0.328174	0.330368	0.0358578	0.0441103	0.00172064	0.359388	3.90076	4.1605		22.6704	0.884319	0.0543196	0.00550189	278.269	10.6237	289.847	27.3679	384.324	288.009	278.269	10.6237
160	Zircon_127	unknown	228.18	0.402825	0.32936	0.01904	0.0453888	0.00144131	0.549304	3.17547	1.02002		22.0318	0.699615	0.0526285	0.0025423	286.159	8.88815	289.077	14.543	312.814	133.083	286.159	8.88815
161	Zircon_128	unknown	123.055	0.298954	0.396155	0.0231692	0.0469408	0.00119003	0.433472	2.53517	14.5857		21.3034	0.540077	0.0612086	0.00322599	295.722	7.3277	338.855	16.8503	646.573	168.872	295.722	7.3277
162	Zircon_129	unknown	56.7828	0.345132	0.361394	0.0405698	0.0497475	0.00213791	0.382821	4.29752	0.0874244		20.1015	0.863866	0.0526876	0.0054641	312.981	13.1291	313.255	30.2586	315.367	286.031	312.981	13.1291
164	Zircon_130	unknown	63.1592	0.387437	0.341685	0.0328823	0.0497743	0.00188197	0.392892	3.78102	-4.69373		20.0907	0.759634	0.0497874	0.00440603	313.146	11.5571	298.447	24.8852	185.079	230.644	313.146	11.5571
165	Zircon_131	unknown	67.4157	0.364521	0.36465	0.0335551	0.0470178	0.00188588	0.435881	4.01098	6.5781		21.2685	0.853077	0.0562486	0.00465842	296.196	11.6116	315.68	24.967	462.196	243.856	296.196	11.6116
168	Zircon_134	unknown	364.406	0.3026	0.322548	0.0128085	0.0445156	0.00102735	0.581169	2.30784	1.10034		22.4641	0.518435	0.052551	0.00169821	280.771	6.34067	283.86	9.83367	309.459	88.8971	280.771	6.34067
170	Zircon_135	unknown	56.8528	0.314074	0.359464	0.0375967	0.0436101	0.00191921	0.420766	4.40083	13.3128		22.9304	1.00913	0.0597815	0.00567216	275.18	11.8554	311.815	28.0809	595.675	296.922	275.18	11.8554
171	Zircon_136	unknown	80.6325	0.531174	0.317736	0.0321321	0.0466745	0.00183022	0.38775	3.92125	-4.73407		21.425	0.840127	0.0493726	0.00460233	294.082	11.2726	280.16	24.7594	165.564	240.921	294.082	11.2726
172	Zircon_137	unknown	83.5491	0.423643	0.389614	0.0369512	0.0450329	0.00191969	0.449476	4.26285	17.6516		22.206	0.946609	0.0627485	0.00531607	283.963	11.8422	334.087	27	699.717	278.281	283.963	11.8422
174	Zircon_139	unknown	99.1304	0.664927	0.359228	0.0285145	0.0472972	0.00134769	0.358969	2.8494	4.60601		21.1429	0.602445	0.055085	0.00408106	297.916	8.29567	311.638	21.3012	415.675	213.633	297.916	8.29567
176	Zircon_140	unknown	152.698	0.417815	0.396675	0.0246849	0.0473654	0.00135826	0.460814	2.86762	13.7088		21.1125	0.605426	0.0607397	0.00335457	298.336	8.3602	339.234	17.9459	630.029	175.602	298.336	8.3602
177	Zircon_141	unknown	143.128	0.537304	0.417626	0.0276213	0.0559517	0.00212186	0.573385	3.79231	0.963658		17.8725	0.677782	0.0541343	0.00293336	350.97	12.954	354.352	19.7839	376.643	153.554	350.97	12.954
179	Zircon_143	unknown	313.485	0.318257	0.330241	0.0140467	0.0462506	0.000843467	0.428754	1.82369	-0.590319		21.6213	0.394306	0.051786	0.00198997	291.471	5.19714	289.75	10.7219	275.973	104.17	291.471	5.19714
180	Zircon_144	unknown	102.458	0.715347	0.352273	0.032842	0.0462913	0.00161301	0.373756	3.48447	5.0418		21.6023	0.752728	0.0551923	0.0047726	291.721	9.93839	306.429	24.6601	420.023	249.833	291.721	9.93839
182	Zircon_145	unknown	100.041	0.418186	0.389395	0.0342527	0.048859	0.00174849	0.40683	3.57864	8.58613		20.467	0.732442	0.0578021	0.00464472	307.523	10.7468	333.927	25.0322	522.27	243.138	307.523	10.7468
184	Zircon_147	unknown	79.3993	0.31186	0.354316	0.0354262	0.0466467	0.00201547	0.432136	4.3207	4.78075		21.4377	0.926262	0.0550894	0.00496726	293.911	12.4139	307.962	26.5604	415.854	260.022	293.911	12.4139
185	Zircon_148	unknown	98.5492	0.390911	0.334891	0.0270033	0.0467228	0.0016633	0.441498	3.55993	-0.368931		21.4028	0.761925	0.0519845	0.00376102	294.379	10.244	293.293	20.54	284.729	196.88	294.379	10.244
186	Zircon_149	unknown	75.0516	0.38565	0.347618	0.0290952	0.049367	0.00166605	0.403211	3.37482	-2.48382		20.2564	0.683618	0.0510699	0.0039116	310.644	10.2351	302.928	21.9222	243.985	204.762	310.644	10.2351
188	Zircon_150	unknown	69.7795	0.326769	0.358785	0.0283483	0.0455947	0.00168097	0.466608	3.68676	8.30792		21.9324	0.808593	0.0570714	0.00398833	287.428	10.364	311.307	21.1839	494.294	208.778	287.428	10.364
190	Zircon_152	unknown	87.6548	0.635116	0.336913	0.0295736	0.0462828	0.00149236	0.367339	3.22443	1.08355		21.6063	0.69668	0.0527954	0.00431029	291.669	9.1951	294.83	22.4611	320.014	225.632	291.669	9.1951
191	Zircon_153	unknown	88.2586	0.684118	0.347673	0.0329374	0.0485812	0.00145453	0.316036	2.99403	-0.930379		20.5841	0.616293	0.0519041	0.00466521	305.815	8.9424	302.97	24.8162	281.189	244.211	305.815	8.9424
192	Zircon_154	unknown	79.4289	0.351807	0.376852	0.0350001	0.046845	0.00165342	0.380034	3.52957	10.0252		21.347	0.753457	0.0583454	0.00501227	295.132	10.182	324.719	25.8114	542.757	262.378	295.132	10.182
194	Zircon_155	unknown	93.7398	0.346145	0.388613	0.029906	0.0473519	0.00138214	0.379291	2.91887	11.7695		21.1185	0.61642	0.0595221	0.0042383	298.253	8.5073	333.356	21.8679	586.248	221.863	298.253	8.5073
197	Zircon_158	unknown	182.985	0.809145	0.329291	0.0225258	0.0439712	0.00101994	0.339082	2.31956	4.18656		22.7421	0.527518	0.0543138	0.00349533	277.411	6.29823	289.025	17.2064	384.084	182.971	277.411	6.29823
198	Zircon_159	unknown	84.2597	0.362721	0.356281	0.044239	0.0488482	0.00211168	0.34815	4.32294	0.643297		20.4716	0.884973	0.0528984	0.00615742	307.456	12.9792	309.434	33.1197	324.441	322.325	307.456	12.9792
201	Zircon_161	unknown	220.235	0.324532	0.333908	0.017495	0.0464878	0.00121145	0.497371	2.60596	-0.13222		21.511	0.560568	0.0520938	0.00236789	292.932	7.46285	292.545	13.3174	289.529	123.953	292.932	7.46285
202	Zircon_162	unknown	55.7932	0.461579	0.376496	0.0398661	0.0483859	0.00182398	0.356005	3.76964	6.51395		20.6672	0.779079	0.0564339	0.00558414	304.614	11.2158	324.456	29.4076	469.48	292.314	304.614	11.2158
203	Zircon_163	unknown	97.0066	0.412083	0.320259	0.0302026	0.04605	0.00161995	0.373016	3.5178	-2.80213		21.7155	0.763909	0.0504394	0.00441347	290.235	9.98346	282.102	23.2282	215.295	231.034	290.235	9.98346
204	Zircon_164	unknown	67.9074	0.347035	0.39335	0.0380516	0.0485299	0.00207743	0.442512	4.28074	10.2502		20.6059	0.882083	0.0587853	0.00509965	305.499	12.7726	336.813	27.7295	559.153	266.952	305.499	12.7726
205	Zircon_165	unknown	98.2236	0.484721	0.366692	0.0300081	0.0447528	0.00168861	0.461074	3.77319	12.388		22.3449	0.843117	0.0594264	0.00431537	282.235	10.4195	317.199	22.2945	582.753	225.897	282.235	10.4195
206	Zircon_166_Pinonal1	unknown	77.7558	0.41069	0.358001	0.0306363	0.0481203	0.00152599	0.370572	3.17121	2.55495		20.7813	0.659017	0.053958	0.00428876	302.98	9.38584	310.721	22.9069	369.295	224.505	302.98	9.38584

## Sheet: PlotDat26
Source sheet	Arenque	0.3	293.459	1	288.902	6.66097	9	322.178	10.5471
Plot name	Average22	36.7	293.459	2	289.395	9.06362	12	263.759	10.3256
Plot Type	15			3	310.526	8.01878	IsoLine	IsoLine	IsoLine	IsoLine
1st free col	11			4	309.922	11.6143
Sigma Level	1			5	274.605	9.5173
Absolute Errs	TRUE			6	286.113	9.06583
Symbol Type	1			7	303.219	12.0762
Inverse Plot	FALSE			8	279.348	9.76843
Color Plot	TRUE			10	299.758	5.31234
3D plot	FALSE			11	290.401	9.86347
Linear	FALSE			13	285.323	12.1865
Data Range	X6:Y41			14	311.89	8.86493
Filled Symbols	FALSE			15	288.154	8.16822
ConcAge	FALSE			16	290.393	11.8628
ConcSwap	FALSE			17	304.123	12.0758
1st Symbol-row	1			18	282.708	10.8388
				19	294.833	11.0989
				20	304.187	8.31599
				21	269.012	11.1638
				22	296.864	10.4016
				23	296.709	8.84358
				24	301.661	9.44115
				25	283.788	6.32459
				26	310.005	12.3045
				27	278.527	9.9863
				28	308.364	11.455
				29	277.504	9.92408
				30	287.481	6.20346
				31	303.242	10.1622
				32	295.535	8.1624
				33	285.279	12.8857
				34	296.734	8.26375
				35	293.133	11.6773
				36	304.244	9.48756
				IsoLine	IsoLine	IsoLine	IsoLine

## Sheet: Arenque
Analysis	AnalysisName	AnalysisType	U (ppm)	Th/U	Ratio 207Pb/235U	Error1S	Ratio 206Pb/238U	Error1S	rho	% Error 6/8 1S	% disc. (6/8-7/5)	Filter	Ratio 238U/206Pb	Error1S	Ratio 207Pb/206Pb	Error1S	206Pb/238U Age (Ma)	Error1S	207Pb/235Pb Age (Ma)	Error1S	207Pb/206Pb Age (Ma)	Error1S	"Best Age"	Unc 1S
68	Zircon_51	unknown	57.2019	0.353762	0.474182	0.0495138	0.049421	0.0022752	0.440887	4.60372	26.7215	High disc	20.2343	0.931531	0.0695877	0.00652196	310.976	13.9766	394.073	34.104	916.21	341.404	310.976	13.9766
78	Zircon_60	unknown	84.747	0.37379	-0.0793748	0.0317228	0.0462258	0.00176847	-0.1	3.82572	128.826	High disc	21.6329	0.827616	-0.0124536	0.00495435	291.318	10.8969	-83.9745	34.988	1	259.356	291.318	10.8969
89	Zircon_69	unknown	69.2456	0.427385	0.456547	0.0377038	0.0481566	0.00183043	0.460253	3.80099	25.9395	High disc	20.7656	0.789296	0.0687588	0.00504124	303.204	11.2579	381.854	26.284	891.513	263.893	303.204	11.2579
57	Zircon_42	unknown	53.5767	0.334139	0.274402	0.047449	0.0455195	0.00237354	0.301551	5.21435	14.2027	High error	21.9686	1.14552	0.0437209	0.0072082	286.964	14.6351	246.207	37.8051	1	377.332	286.964	14.6351
56	Zircon_41_139-02	unknown	187.494	0.6046	0.356223	0.0218421	0.0458338	0.00108061	0.384512	2.35766	7.09184		21.8179	0.514394	0.0563682	0.00319054	288.902	6.66097	309.391	16.3528	466.9	167.016	288.902	6.66097
58	Zircon_43	unknown	94.0252	0.412693	0.342042	0.0255373	0.0459138	0.0014705	0.428969	3.20274	3.22151		21.78	0.697556	0.05403	0.00364395	289.395	9.06362	298.718	19.3214	372.3	190.751	289.395	9.06362
59	Zircon_44	unknown	116.424	0.668913	0.301802	0.0269241	0.0493478	0.00130526	0.296489	2.64501	13.757		20.2643	0.535994	0.0443561	0.00377913	310.526	8.01878	267.807	21.0003	1	197.829	310.526	8.01878
60	Zircon_45	unknown	71.1148	0.335649	0.403686	0.0423936	0.0492495	0.00189033	0.365494	3.83828	11.0983		20.3048	0.779354	0.0594485	0.00581112	309.922	11.6143	344.318	30.6662	583.56	304.196	309.922	11.6143
62	Zircon_46	unknown	55.7804	0.362097	0.310336	0.0356772	0.0435171	0.00154057	0.307938	3.54015	0.0596754		22.9795	0.813508	0.0517216	0.00565712	274.605	9.5173	274.442	27.6463	273.12	296.136	274.605	9.5173
63	Zircon_47	unknown	85.6209	0.425499	0.365525	0.0389451	0.0453815	0.00147011	0.304044	3.23945	10.5617		22.0354	0.713827	0.0584168	0.00592939	286.113	9.06583	316.332	28.959	545.428	310.387	286.113	9.06583
64	Zircon_48	unknown	62.8894	0.39473	0.370879	0.0459193	0.048159	0.00196347	0.329293	4.07705	5.63473		20.7645	0.84658	0.0558538	0.0065297	303.219	12.0762	320.304	34.0115	446.562	341.812	303.219	12.0762
65	Zircon_49	unknown	112.805	0.304339	0.316031	0.030495	0.0442851	0.00158238	0.370301	3.57317	0.180256		22.581	0.806857	0.0517572	0.00463921	279.348	9.76843	278.845	23.5284	274.698	242.851	279.348	9.76843
66	Zircon_50	unknown	93.2142	0.485638	0.35936	0.0347395	0.0512461	0.0017199	0.347175	3.35616	3.24079		19.5137	0.654911	0.050859	0.00461075	322.178	10.5471	311.737	25.9489	234.443	241.361	322.178	10.5471
69	Zircon_52	unknown	195.386	0.697331	0.36155	0.0222442	0.0475965	0.000863272	0.294799	1.81373	4.54144		21.01	0.381064	0.0550925	0.0032389	299.758	5.31234	313.371	16.5887	415.978	169.548	299.758	5.31234
70	Zircon_53	unknown	114.633	0.394312	0.346439	0.0260128	0.0460771	0.00160052	0.462611	3.47357	4.00752		21.7028	0.753861	0.0545306	0.00363002	290.401	9.86347	302.039	19.6169	393.029	190.022	290.401	9.86347
71	Zircon_54	unknown	73.2972	0.443614	0.320345	0.0338646	0.0417628	0.0016686	0.377951	3.99543	6.9796		23.9448	0.956696	0.0556324	0.00544483	263.759	10.3256	282.168	26.0428	437.726	285.022	263.759	10.3256
72	Zircon_55	unknown	67.3038	0.355873	0.329865	0.0390066	0.0452533	0.00197591	0.369245	4.36633	1.45084		22.0978	0.964863	0.0528669	0.00580974	285.323	12.1865	289.463	29.7824	323.088	304.125	285.323	12.1865
74	Zircon_56	unknown	94.6519	0.581478	0.37518	0.0324788	0.0495698	0.00144329	0.336338	2.91164	3.71769		20.1736	0.587381	0.0548935	0.00447521	311.89	8.86493	323.485	23.9812	407.886	234.265	311.89	8.86493
75	Zircon_57	unknown	113.974	0.666429	0.336605	0.0276245	0.0457124	0.00132497	0.353182	2.8985	2.23561		21.8759	0.634073	0.0534053	0.00410042	288.154	8.16822	294.596	20.9856	346.056	214.646	288.154	8.16822
76	Zircon_58	unknown	87.4813	0.425391	0.385593	0.033575	0.0460758	0.00192494	0.479799	4.17778	14.0333		21.7034	0.90672	0.0606953	0.00463691	290.393	11.8628	331.145	24.6042	628.454	242.729	290.393	11.8628
77	Zircon_59	unknown	79.2431	0.56555	0.394533	0.0431317	0.048306	0.00196368	0.37184	4.06508	11.0326		20.7013	0.841526	0.0592353	0.00601147	304.123	12.0758	337.676	31.4049	575.757	314.684	304.123	12.0758
80	Zircon_61	unknown	57.4217	0.369784	0.285513	0.0363846	0.0448294	0.00175669	0.307497	3.91861	9.79326		22.3068	0.874116	0.0461915	0.00560125	282.708	10.8388	255.022	28.739	7.62406	293.212	282.708	10.8388
81	Zircon_62	unknown	112.099	0.43872	0.291488	0.0251738	0.0467964	0.00180224	0.445935	3.85123	11.906		21.3692	0.822974	0.0451759	0.00349212	294.833	11.0989	259.73	19.7919	1	182.804	294.833	11.0989
82	Zircon_63	unknown	62.1686	0.356435	0.424623	0.0436274	0.0483165	0.0013523	0.27241	2.79885	18.135		20.6969	0.579274	0.0637393	0.00630115	304.187	8.31599	359.352	31.0949	732.99	329.846	304.187	8.31599
83	Zircon_64	unknown	77.411	0.457113	0.266394	0.0316484	0.042612	0.00180551	0.35665	4.2371	10.8565		23.4675	0.994343	0.045341	0.0050324	269.012	11.1638	239.807	25.3754	1	263.435	269.012	11.1638
84	Zircon_65	unknown	72.8682	0.32217	0.362881	0.0413549	0.0471262	0.00168954	0.314589	3.58513	5.89502		21.2196	0.760751	0.0558471	0.00604134	296.864	10.4016	314.364	30.8105	446.296	316.248	296.864	10.4016
86	Zircon_66	unknown	118.289	0.378594	0.314293	0.0247423	0.0471011	0.00143643	0.387389	3.04967	6.47307		21.2309	0.647474	0.0483952	0.00351236	296.709	8.84358	277.503	19.1152	118.631	183.863	296.709	8.84358
87	Zircon_67	unknown	106.344	0.642527	0.389626	0.0336124	0.0479057	0.00153467	0.371344	3.20352	10.7523		20.8744	0.668715	0.0589874	0.00472488	301.661	9.44115	334.096	24.5602	566.632	247.334	301.661	9.44115
88	Zircon_68	unknown	224.152	0.520798	0.329009	0.0160681	0.0450045	0.00102522	0.46645	2.27805	1.76925		22.22	0.506181	0.0530213	0.00229049	283.788	6.32459	288.809	12.2763	329.709	119.901	283.788	6.32459
90	Zircon_70	unknown	82.9505	0.479426	0.433545	0.0393683	0.0492629	0.00200271	0.447698	4.06534	17.9629		20.2992	0.825234	0.0638283	0.00518265	310.005	12.3045	365.691	27.8846	735.944	271.297	310.005	12.3045
92	Zircon_71	unknown	98.2291	0.677294	0.36112	0.0323509	0.044152	0.00161747	0.408932	3.66341	12.3953		22.649	0.829728	0.0593199	0.00484952	278.527	9.9863	313.051	24.1335	578.857	253.859	278.527	9.9863
93	Zircon_72	unknown	81.8662	0.6151	0.330089	0.0329629	0.0489959	0.00186397	0.380964	3.80433	6.07409		20.4099	0.776458	0.0488618	0.00451142	308.364	11.455	289.634	25.1637	141.207	236.162	308.364	11.455
94	Zircon_73	unknown	117.851	0.675738	0.365086	0.0234411	0.0439864	0.00160714	0.569052	3.65371	13.8739		22.7343	0.830645	0.0601971	0.00317826	277.504	9.92408	316.005	17.436	610.667	166.373	277.504	9.92408
95	Zircon_74	unknown	229.321	1.12493	0.350782	0.021081	0.0456034	0.00100616	0.367127	2.20634	6.20126		21.9282	0.48381	0.0557877	0.00311858	287.481	6.20346	305.309	15.8466	443.93	163.249	287.481	6.20346
96	Zircon_75	unknown	87.8912	0.533938	0.397286	0.0312219	0.0481628	0.00165228	0.43653	3.4306	12.0152		20.7629	0.712293	0.0598259	0.00422998	303.242	10.1622	339.678	22.6884	597.285	221.427	303.242	10.1622
98	Zircon_76	unknown	103.463	0.31051	0.302373	0.0299582	0.0469104	0.00132555	0.285202	2.8257	9.23184		21.3172	0.602361	0.0467489	0.00443938	295.535	8.1624	268.252	23.3566	36.4201	232.391	295.535	8.1624
99	Zircon_77	unknown	75.9361	0.35424	0.344623	0.0367431	0.0452463	0.00208928	0.433093	4.61757	5.39444		22.1013	1.02054	0.0552408	0.00530865	285.279	12.8857	300.669	27.7463	421.981	277.893	285.279	12.8857
100	Zircon_78	unknown	110.222	0.590193	0.413912	0.0287719	0.0471052	0.00134226	0.409926	2.84949	18.5197		21.2291	0.604921	0.0637291	0.00404064	296.734	8.26375	351.688	20.6622	732.652	211.516	296.734	8.26375
101	Zircon_79	unknown	97.4999	0.627622	0.40697	0.0317607	0.0465204	0.00189565	0.522141	4.07488	18.2709		21.4959	0.875934	0.063448	0.00422301	293.133	11.6773	346.691	22.9211	723.28	221.062	293.133	11.6773
102	Zircon_80_139-02	unknown	88.1676	0.463837	0.386304	0.0343852	0.0483256	0.00154283	0.358673	3.19257	9.0132		20.6929	0.660638	0.0579762	0.00481714	304.244	9.48756	331.666	25.185	528.863	252.164	304.244	9.48756

## Sheet: PlotDat27
Source sheet	Paso de Oro	0.3	274.177	1	274.595	6.7509	10	302.874	6.93707
Plot name	Average23	19.7	274.177	2	271.875	10.8388	IsoLine	IsoLine	IsoLine	IsoLine
Plot Type	15			3	258.354	6.95617
1st free col	11			4	283.483	9.02338
Sigma Level	1			5	281.135	7.04115
Absolute Errs	TRUE			6	277.103	8.95817
Symbol Type	1			7	277.082	5.87927
Inverse Plot	FALSE			8	282.365	8.36387
Color Plot	TRUE			9	276.486	6.3288
3D plot	FALSE			11	279.958	7.07678
Linear	FALSE			12	267.031	7.5294
Data Range	X9:Y27			13	274.952	7.42261
Filled Symbols	FALSE			14	267.907	6.93928
ConcAge	FALSE			15	282.864	9.74793
ConcSwap	FALSE			16	269.925	8.86337
1st Symbol-row	1			17	271.947	6.34
				18	267.159	8.3333
				19	276.463	8.25222
				IsoLine	IsoLine	IsoLine	IsoLine

## Sheet: Paso de Oro
Analysis	AnalysisName	AnalysisType	U (ppm)	Th/U	Ratio 207Pb/235U	Error1S	Ratio 206Pb/238U	Error1S	rho	% Error 6/8 1S	% disc. (6/8-7/5)	Filter	Ratio 238U/206Pb	Error1S	Ratio 207Pb/206Pb	Error1S	206Pb/238U Age (Ma)	Error1S	207Pb/235Pb Age (Ma)	Error1S	207Pb/206Pb Age (Ma)	Error1S	"Best Age"	Unc 1S
8	Zircon_1_T11_07	unknown	67.2456	0.390669	0.281119	0.0287824	0.0447497	0.00149133	0.325497	3.3326	-10.8678	Inv disc	22.3465	0.744719	0.0455617	0.00441079	282.216	9.20222	251.545	22.8122	1	230.894	282.216	9.20222
29	Zircon_20	unknown	122.125	0.740349	0.408821	0.0281765	0.0420562	0.00117382	0.404964	2.79107	31.0465	High disc	23.7777	0.663654	0.0705021	0.00444284	265.574	7.26177	348.026	20.3078	943.011	232.569	265.574	7.26177
32	Zircon_22	unknown	124.121	0.804595	0.22767	0.0163361	0.0419188	0.00135055	0.449013	3.22182	-21.3243	High disc	23.8556	0.768585	0.0393909	0.00252549	264.724	8.3562	208.274	13.5113	1	132.204	264.724	8.3562
15	Zircon_7	unknown	69.1303	0.443069	0.280001	0.0253312	0.0452406	0.00134729	0.329182	2.97805	-12.125	Inv disc	22.1041	0.65827	0.044888	0.00383461	285.244	8.30952	250.658	20.0944	1	200.733	285.244	8.30952
20	Zircon_11	unknown	221.135	0.415398	0.296924	0.0164264	0.0457571	0.00123305	0.487108	2.69478	-8.47142	Inv disc	21.8545	0.588931	0.0470637	0.00227388	288.429	7.6012	263.995	12.8605	52.4596	119.032	288.429	7.6012
21	Zircon_12	unknown	71.4727	0.501533	0.267542	0.0265093	0.0427909	0.00136065	0.320914	3.17976	-10.8809	Inv disc	23.3694	0.743092	0.045346	0.00425544	270.118	8.41164	240.727	21.2356	1	222.762	270.118	8.41164
26	Zircon_16	unknown	165.764	0.776469	0.282325	0.0142962	0.0427061	0.00121249	0.560681	2.83915	-6.34038	Inv disc	23.4158	0.66481	0.0479467	0.00201038	269.594	7.49632	252.5	11.3202	96.6379	105.238	269.594	7.49632
9	Zircon_2	unknown	119.285	0.733507	0.293919	0.0203103	0.0435154	0.00109277	0.36341	2.51123	-4.71815		22.9804	0.57709	0.0489873	0.00315367	274.595	6.7509	261.639	15.9382	147.222	165.087	274.595	6.7509
10	Zircon_3	unknown	70.0902	0.560667	0.326813	0.0261472	0.0430751	0.00175374	0.508875	4.07134	5.61098		23.2152	0.945172	0.0550264	0.00378984	271.875	10.8388	287.13	20.0099	413.295	198.388	271.875	10.8388
11	Zircon_4	unknown	93.7774	0.633939	0.288262	0.0200546	0.0408897	0.00112316	0.394822	2.74681	-0.450361		24.456	0.671762	0.0511295	0.00326814	258.354	6.95617	257.19	15.8067	246.673	171.079	258.354	6.95617
12	Zircon_5	unknown	81.313	0.640796	0.314478	0.0220766	0.044955	0.00146263	0.463461	3.25354	-2.0591		22.2444	0.723732	0.0507353	0.00315605	283.483	9.02338	277.646	17.0533	228.821	165.211	283.483	9.02338
14	Zircon_6	unknown	97.3339	0.563392	0.317483	0.0227875	0.0445745	0.00114091	0.356605	2.55955	-0.416348		22.4343	0.574219	0.0516574	0.00346397	281.135	7.04115	279.964	17.5623	270.273	181.33	281.135	7.04115
16	Zircon_8	unknown	110.03	0.560879	0.322492	0.019797	0.0439214	0.00145062	0.53802	3.30277	2.42312		22.768	0.751974	0.0532526	0.00275559	277.103	8.95817	283.817	15.1997	339.576	144.248	277.103	8.95817
17	Zircon_9	unknown	106.048	0.472988	0.325415	0.0196874	0.043918	0.000952045	0.358314	2.16778	3.23983		22.7697	0.493596	0.0537394	0.00303532	277.082	5.87927	286.059	15.0822	360.145	158.891	277.082	5.87927
18	Zircon_10	unknown	101.612	0.709734	0.327022	0.0214635	0.0447738	0.00135549	0.461266	3.02742	1.7444		22.3345	0.67616	0.0529727	0.0030848	282.365	8.36387	287.29	16.423	327.63	161.481	282.365	8.36387
22	Zircon_13	unknown	261.775	0.474444	0.304081	0.0130326	0.0438215	0.00102474	0.545616	2.33845	-2.49677		22.8198	0.53363	0.050327	0.00180761	276.486	6.3288	269.583	10.1474	210.122	94.6236	276.486	6.3288
23	Zircon_14	unknown	119.047	0.59248	0.415229	0.0245687	0.0481029	0.00112784	0.396261	2.34464	16.4293		20.7887	0.487421	0.0626059	0.00340109	302.874	6.93707	352.634	17.6273	694.871	178.037	302.874	6.93707
24	Zircon_15	unknown	113.987	0.764644	0.348319	0.0187435	0.0443838	0.00114647	0.480026	2.58309	8.39359		22.5307	0.581988	0.0569183	0.0026869	279.958	7.07678	303.456	14.1152	488.369	140.652	279.958	7.07678
27	Zircon_17	unknown	126.837	0.742329	0.286552	0.0187102	0.0422917	0.00121736	0.440846	2.87847	-4.19018		23.6453	0.680623	0.0491414	0.00288003	267.031	7.5294	255.842	14.7666	154.582	150.762	267.031	7.5294
28	Zircon_18	unknown	111.437	0.745187	0.31052	0.0183694	0.0435731	0.00120157	0.466146	2.75759	-0.133867		22.9499	0.632864	0.0516856	0.00270505	274.952	7.42261	274.584	14.2325	271.523	141.603	274.952	7.42261
31	Zircon_21	unknown	111.425	0.628907	0.306925	0.0217465	0.0424334	0.0011221	0.37322	2.64437	1.4509		23.5663	0.623182	0.0524593	0.00344832	267.907	6.93928	271.794	16.8954	305.482	180.51	267.907	6.93928
33	Zircon_23	unknown	75.139	0.632324	0.314376	0.0265157	0.0448547	0.00157992	0.417614	3.52232	-1.87239		22.2942	0.785273	0.0508324	0.00389563	282.864	9.74793	277.567	20.4839	233.238	203.926	282.864	9.74793
34	Zircon_24	unknown	67.4536	0.518892	0.327836	0.02997	0.0427598	0.00143368	0.366763	3.35286	6.66375		23.3865	0.784117	0.0556058	0.00472911	269.925	8.86337	287.912	22.9178	436.663	247.556	269.925	8.86337
35	Zircon_25	unknown	139.26	0.740439	0.328065	0.0197209	0.0430869	0.00102583	0.396063	2.38085	5.93489		23.2089	0.55257	0.0552221	0.0030481	271.947	6.34	288.087	15.0778	421.226	159.56	271.947	6.34
37	Zircon_26	unknown	75.113	0.580523	0.320297	0.0252243	0.0423123	0.00134736	0.404342	3.18431	5.60433		23.6338	0.752573	0.0549016	0.00395445	267.159	8.3333	282.131	19.3989	408.217	207.005	267.159	8.3333
38	Zircon_27	unknown	100.933	0.472942	0.319795	0.0234861	0.0438177	0.00133617	0.415216	3.04939	1.91063		22.8218	0.695927	0.0529323	0.00353646	276.463	8.25222	281.745	18.069	325.894	185.125	276.463	8.25222

## Sheet: PlotDat34
Source sheet	Benemerito	0.3	245.58	1	239.368	3.349	10	319.515	4.09531
Plot name	Average30	13.7	245.58	2	245.149	4.20165	12	58.5082	1.55718
Plot Type	15			3	248.291	5.5886	IsoLine	IsoLine	IsoLine	IsoLine
1st free col	11			4	242.425	4.20087
Sigma Level	1			5	234.509	8.96941
Absolute Errs	TRUE			6	261.337	5.24681
Symbol Type	1			7	238.211	8.06552
Inverse Plot	FALSE			8	248.809	3.64259
Color Plot	TRUE			9	246.292	4.45749
3D plot	FALSE			11	247.184	4.42212
Linear	FALSE			13	244.894	7.36572
Data Range	X2:Y36			IsoLine	IsoLine	IsoLine	IsoLine
Filled Symbols	FALSE
ConcAge	FALSE
ConcSwap	FALSE
1st Symbol-row	1

## Sheet: PlotDat35
Source sheet	Benemerito	0.3	245.394	1	244.894	7.36572
Plot name	Average31	10.7	245.394	2	239.368	3.349
Plot Type	15			3	245.149	4.20165
1st free col	8			4	248.291	5.5886
Sigma Level	1			5	242.425	4.20087
Absolute Errs	TRUE			6	234.509	8.96941
Symbol Type	1			7	261.337	5.24681
Inverse Plot	FALSE			8	238.211	8.06552
Color Plot	TRUE			9	248.809	3.64259
3D plot	FALSE			10	246.292	4.45749
Linear	FALSE			IsoLine	IsoLine	IsoLine	IsoLine
Data Range	X35:Y36,X2:Y32
Filled Symbols	FALSE
ConcAge	FALSE
ConcSwap	FALSE
1st Symbol-row	1

## Sheet: Benemerito
Analysis	AnalysisName	AnalysisType	U (ppm)	Th/U	Ratio 207Pb/235U	Error1S	Ratio 206Pb/238U	Error1S	rho	% Error 6/8 1S	% disc. (6/8-7/5)	Filter	Ratio 238U/206Pb	Error1S	Ratio 207Pb/206Pb	Error1S	206Pb/238U Age (Ma)	Error1S	207Pb/235Pb Age (Ma)	Error1S	207Pb/206Pb Age (Ma)	Error1S	"Best Age"	Unc 1S
8	Zircon_01_UMK-137-04	unknown	1424.16	0.94284	0.244994	0.00631949	0.0377343	0.000516279	0.530422	1.36819	-6.81785	Inv disc	26.5011	0.362586	0.0470889	0.00102968	238.782	3.20723	222.502	5.15401	53.7355	53.9014	238.782	3.20723
29	Zircon_19	unknown	44.3112	0.22362	1.01958	0.0829329	0.0798354	0.00398358	0.613443	4.98974	44.1371	High disc	12.5258	0.625003	0.0926245	0.00594995	495.156	23.782	713.704	41.6961	1480.22	311.457	495.156	23.782
32	Zircon_21	unknown	81.2161	0.655466	0.353313	0.0268492	0.0378133	0.00153516	0.534238	4.05983	28.3933	High disc	26.4457	1.07365	0.0677662	0.00435326	239.272	9.53598	307.21	20.1448	861.411	227.88	239.272	9.53598
42	Zircon_30	unknown	2754.77	0.232156	0.285788	0.00777549	0.0227377	0.000407322	0.658426	1.7914	76.0995	High disc	43.9798	0.787852	0.0911581	0.00186668	144.94	2.56748	255.238	6.14028	1449.91	97.7135	144.94	2.56748
46	Zircon_33	unknown	135.669	0.83696	0.652121	0.0360631	0.0416784	0.00127689	0.553997	3.06367	93.6595	High disc	23.9932	0.735074	0.113479	0.0052245	263.237	7.90228	509.783	22.1642	1855.86	273.479	263.237	7.90228
9	Zircon_02	unknown	1061.77	0.713808	0.260014	0.00687968	0.0378287	0.000539148	0.538662	1.42524	-1.95905	High U	26.435	0.376761	0.0498511	0.00111129	239.368	3.349	234.678	5.54399	188.056	58.1732	239.368	3.349
10	Zircon_03	unknown	4117.02	0.407184	0.154939	0.00274629	0.0211437	0.000215812	0.575848	1.02069	8.43576	High U	47.2953	0.48274	0.0531468	0.000770161	134.885	1.36245	146.263	2.41445	335.069	40.3159	134.885	1.36245
12	Zircon_05	unknown	2915.53	0.4093	0.130681	0.00335938	0.0190952	0.000377615	0.769269	1.97754	2.27193	High U	52.3691	1.03562	0.0496348	0.000815233	121.939	2.38873	124.71	3.01682	177.929	42.6754	121.939	2.38873
14	Zircon_06	unknown	5083.59	0.329032	0.0916402	0.0020335	0.0119351	0.00016989	0.641481	1.42345	16.4013	High U	83.7865	1.19266	0.0556876	0.000947965	76.4855	1.0823	89.0302	1.89145	439.936	49.6233	76.4855	1.0823
15	Zircon_07	unknown	3107.68	0.472148	0.182719	0.00389881	0.026611	0.00032322	0.569232	1.21461	0.643657	High U	37.5785	0.456432	0.0497992	0.000873646	169.308	2.02966	170.398	3.34719	185.631	45.7332	169.308	2.02966
16	Zircon_08	unknown	4953.11	0.262438	0.145968	0.00275124	0.0205606	0.00026599	0.686371	1.29369	5.44463	High U	48.6368	0.629209	0.0514897	0.000705791	131.202	1.68019	138.345	2.43773	262.815	36.9463	131.202	1.68019
18	Zircon_10	unknown	1536.6	0.306239	0.23716	0.00513727	0.0333418	0.000529791	0.733543	1.58897	2.20221	High U	29.9924	0.476571	0.0515884	0.000759492	211.436	3.30516	216.092	4.21634	267.209	39.7575	211.436	3.30516
20	Zircon_11	unknown	2173.3	0.294965	0.206	0.00527432	0.0307717	0.000525872	0.667467	1.70895	-2.65741	High U	32.4973	0.555362	0.0485528	0.000925675	195.383	3.2889	190.191	4.44067	126.293	48.4567	195.383	3.2889
21	Zircon_12	unknown	1070.41	0.472069	0.229621	0.00732411	0.0340555	0.000773912	0.712461	2.27251	-2.77999	High U	29.3639	0.667295	0.0489016	0.00109453	215.887	4.82481	209.886	6.04803	143.115	57.2957	215.887	4.82481
22	Zircon_13	unknown	1492.17	0.446843	0.191286	0.00767031	0.0278855	0.000859649	0.768797	3.08278	0.236323	High U	35.8609	1.10551	0.0497511	0.00127576	177.307	5.39149	177.726	6.53773	183.379	66.7827	177.307	5.39149
24	Zircon_15	unknown	1642.12	1.41842	0.278203	0.00545159	0.0389907	0.000438439	0.573834	1.12447	1.07432	High U	25.6471	0.288394	0.0517487	0.000830481	246.582	2.72038	249.231	4.33065	274.32	43.4735	246.582	2.72038
26	Zircon_16	unknown	4313.08	0.456481	0.13321	0.00311837	0.0182269	0.000336187	0.787912	1.84445	9.0467	High U	54.864	1.01194	0.0530058	0.00076409	116.444	2.12847	126.978	2.79413	329.046	39.9981	116.444	2.12847
36	Zircon_25	unknown	1163.26	0.33941	0.296206	0.00806834	0.0401742	0.000715352	0.653705	1.78063	3.74581	High U	24.8916	0.443226	0.0534743	0.00110227	253.921	4.43349	263.432	6.32034	348.973	57.701	253.921	4.43349
38	Zircon_26	unknown	1530.57	0.241032	0.279123	0.00556826	0.0380683	0.000433713	0.571104	1.1393	3.78059	High U	26.2686	0.299279	0.0531779	0.00087083	240.856	2.69345	249.962	4.42015	336.395	45.5856	240.856	2.69345
39	Zircon_27	unknown	2365.4	0.249265	0.189025	0.00510065	0.0258694	0.000513539	0.735668	1.98512	6.77052	High U	38.6557	0.767363	0.0529947	0.000968603	164.65	3.22711	175.797	4.35576	328.57	50.7039	164.65	3.22711
45	Zircon_32	unknown	5351.34	0.282187	0.125427	0.00499457	0.0157996	0.000506412	0.804914	3.20521	18.7239	High U	63.2926	2.02866	0.0575761	0.00136048	101.058	3.21387	119.98	4.5062	513.668	71.2172	101.058	3.21387
11	Zircon_04	unknown	688.358	0.708996	0.255398	0.00789315	0.0398851	0.00061793	0.501297	1.54927	-8.39944	Inv disc	25.072	0.388434	0.0464414	0.00124192	252.129	3.83077	230.951	6.38409	20.5965	65.0115	252.129	3.83077
17	Zircon_09	unknown	923.659	0.714189	0.274128	0.00834369	0.0387599	0.000677022	0.573872	1.74671	0.342271		25.7999	0.450649	0.0512943	0.00127858	245.149	4.20165	245.988	6.64929	254.078	66.9306	245.149	4.20165
23	Zircon_14	unknown	120.267	0.571159	2.35716	0.0704444	0.206319	0.00428586	0.695091	2.0773	1.69626		4.84687	0.100684	0.0828608	0.00178028	1209.21	22.9038	1229.73	21.3061	1265.94	93.1913	1265.94	93.1913
27	Zircon_17	unknown	239.728	1.14171	0.262404	0.0147729	0.0392663	0.000900943	0.407551	2.29445	-4.70785		25.4671	0.58433	0.0484673	0.00249174	248.291	5.5886	236.602	11.8822	122.143	130.436	248.291	5.5886
28	Zircon_18	unknown	675.341	0.135688	0.272173	0.0102701	0.038321	0.000676611	0.467918	1.76564	0.826619		26.0953	0.46075	0.0515117	0.00171782	242.425	4.20087	244.429	8.19711	263.795	89.9236	242.425	4.20087
30	Zircon_20	unknown	255.585	0.928516	0.257807	0.0214991	0.0370467	0.00144288	0.46704	3.89475	-0.68693		26.9929	1.05131	0.0504711	0.00372166	234.509	8.96941	232.898	17.3555	216.748	194.82	234.509	8.96941
33	Zircon_22	unknown	248.49	0.35513	0.357463	0.0167706	0.0413715	0.000847556	0.436668	2.04865	18.7429		24.1712	0.495184	0.0626656	0.00264488	261.337	5.24681	310.319	12.5444	696.901	138.452	261.337	5.24681
34	Zircon_23	unknown	87.847	0.815477	0.278361	0.0243773	0.0376424	0.00129822	0.393816	3.44882	4.679		26.5658	0.916206	0.0536327	0.0043173	238.211	8.06552	249.356	19.3625	355.658	225.999	238.211	8.06552
35	Zircon_24	unknown	460.374	0.0293634	0.286985	0.0107064	0.0393497	0.000587273	0.40005	1.49245	2.96394		25.4132	0.379278	0.0528952	0.00180855	248.809	3.64259	256.183	8.44694	324.305	94.6727	248.809	3.64259
40	Zircon_28	unknown	398.09	0.145806	0.280053	0.0137725	0.0389441	0.000718373	0.37509	1.84463	1.78958		25.6779	0.473661	0.0521553	0.00237764	246.292	4.45749	250.7	10.9249	292.225	124.463	246.292	4.45749
41	Zircon_29	unknown	791.208	0.143331	0.386693	0.00836908	0.0508119	0.000667543	0.60702	1.31375	3.89234		19.6804	0.258552	0.0551951	0.000949307	319.515	4.09531	331.951	6.12812	420.133	49.6937	319.515	4.09531
44	Zircon_31	unknown	689.279	1.20524	0.275823	0.0105692	0.0390878	0.000712772	0.475882	1.82352	0.0626269		25.5835	0.466519	0.0511786	0.0017248	247.184	4.42212	247.339	8.41164	248.883	90.289	247.184	4.42212
47	Zircon_34	unknown	903.251	0.727283	0.0614311	0.00376763	0.0091171	0.000243752	0.435925	2.67357	3.46438		109.684	2.93248	0.0488686	0.00269739	58.5082	1.55718	60.5352	3.60418	141.531	141.202	58.5082	1.55718
48	Zircon_35_UMK137-04	unknown	126.756	0.728184	0.268439	0.0220333	0.0387187	0.00118681	0.373444	3.06521	-1.40841		25.8273	0.791662	0.0502832	0.00382863	244.894	7.36572	241.445	17.6376	208.107	200.419	244.894	7.36572

## Sheet: PlotDat1
Source sheet	Trincheras	0.3	256.474	1	239.616	5.15096	4	196.458	4.79341
Plot name	Average1	31.7	256.474	2	270.257	7.63194	27	214.296	4.2213
Plot Type	15			3	235.514	5.04279	IsoLine	IsoLine	IsoLine	IsoLine
1st free col	11			5	247.85	5.76755
Sigma Level	1			6	261.035	12.4202
Absolute Errs	TRUE			7	257.976	7.11413
Symbol Type	1			8	258.311	6.40512
Inverse Plot	FALSE			9	264.218	2.88915
Color Plot	TRUE			10	261.187	5.33007
3D plot	FALSE			11	244.816	3.36244
Linear	FALSE			12	287.845	5.01861
Data Range	X2:Y41			13	288.8	3.69387
Filled Symbols	FALSE			14	258.075	5.81791
ConcAge	FALSE			15	252.352	4.15772
ConcSwap	FALSE			16	254.818	2.45621
1st Symbol-row	1			17	226.25	4.69878
				18	263.472	5.41126
				19	256.223	3.91916
				20	252.153	5.16737
				21	246.262	6.21958
				22	260.183	3.36891
				23	263.511	5.46756
				24	255.685	3.43344
				25	251.493	9.29619
				26	250.931	5.81301
				28	232.89	6.14939
				29	258.337	4.60457
				30	269.179	5.55375
				31	246.602	4.89826
				IsoLine	IsoLine	IsoLine	IsoLine

[truncated: 52 more sheets: PlotDat2, PlotDat3, Trincheras, PlotDat28, PlotDat29, PlotDat42, PlotDat43, PlotDat44, Linares, PlotDat31, Chaneque, PlotDat32, PlotDat33, Nayade, PlotDat30, Tamaulipas, PlotDat4, PlotDat6, Erizo, PlotDat5 …]
